# Supplementary material for: Long afterglow epoxidized soybean oil polymer composites with reversible dynamic cross-linking for intelligent coating
Source: Royal Society of Chemistry journal article supplement (doi:10.1039/d4py00857j), 2024-01-01
Supplement: d4py00857j3.pdf [file d4py00857j3.pdf]

Electronic Supplementary Material (ESI) for Polymer Chemistry. This journal is © The Royal Society of Chemistry 2024

## Supporting Information for

### Long afterglow epoxidized soybean oil polymer composites with reversible dynamic cross-linking for intelligent coating

**Author:** Jiaman Hu,<sup>a</sup> Zihao Wang,<sup>a</sup> Minglin Yang,<sup>a</sup> Chuansong Yu,<sup>a</sup> Siyu Li,<sup>a</sup> Yinggang Miao,<sup>b</sup> Xiangqian Quan,<sup>c</sup> Jize Liu<sup>\*a</sup> and Shiyang Shao<sup>\*a</sup>

<sup>a</sup> School of Materials Science and Engineering, Hainan University (Haikou, 570228 Hainan, China)

<sup>b</sup> Shaanxi Key Laboratory of Impact Dynamics and its Engineering Application, School of Aeronautics, Northwestern Polytechnical University, Xi'an 710072, China; Joint International Research Laboratory of Impact Dynamics and its Engineering Applications, School of Aeronautics, Northwestern Polytechnical University, Xi'an 710072, China; National Key Laboratory of Strength and Structural Integrity, Xi'an 710072, China

<sup>c</sup> Institute of Deep-Sea Science and Engineering, Chinese Academy of Sciences, Sanya 572000, China; Department of Mechanical and Aerospace Engineering and Scripps Institution of Oceanography, University of California San Diego La Jolla, CA 92093, USA

Corresponding authors: [ljz@hainanu.edu.cn](mailto:ljz@hainanu.edu.cn); [ssyang@hainanu.edu.cn](mailto:ssyang@hainanu.edu.cn)

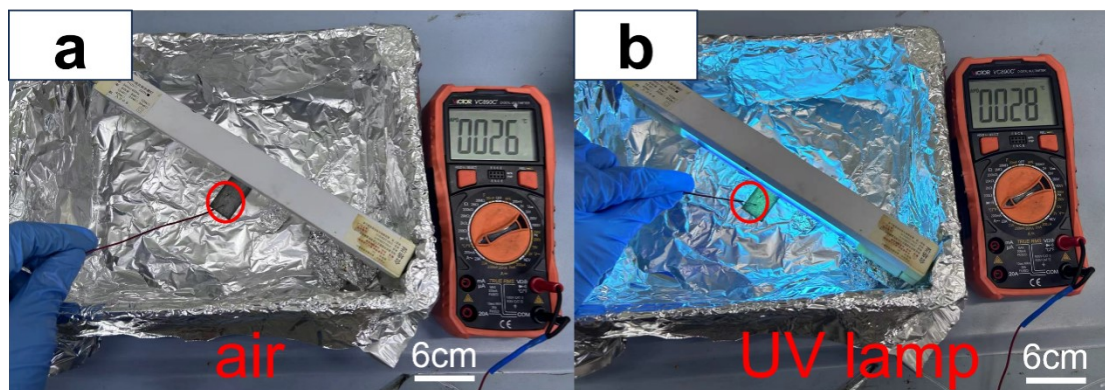

**Figure S1.** Temperature images of SMT coatings under UV lamp and in air.

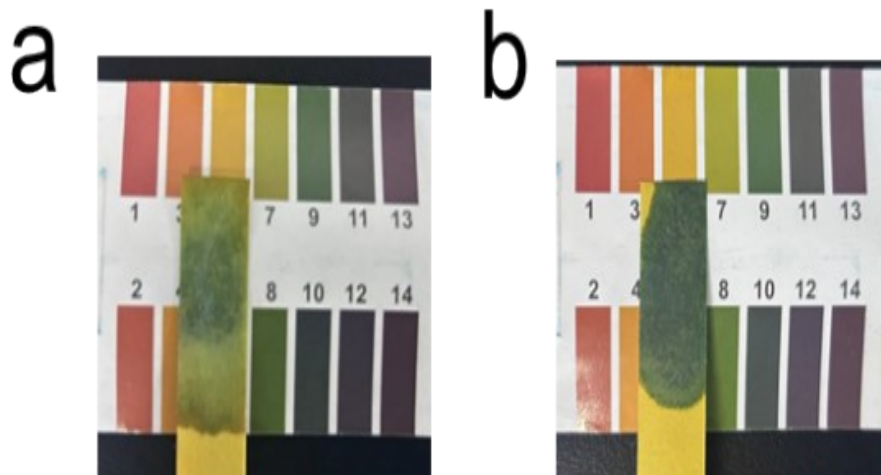

**Figure S2.** Comparison of PH value of solution of  $\text{SrAl}_2\text{O}_4: \text{Eu}^{2+}, \text{Dy}^{3+}$  powder dissolved in water before and after modification. (a) PH value of modified powder. (b) PH value of unmodified powder solution.

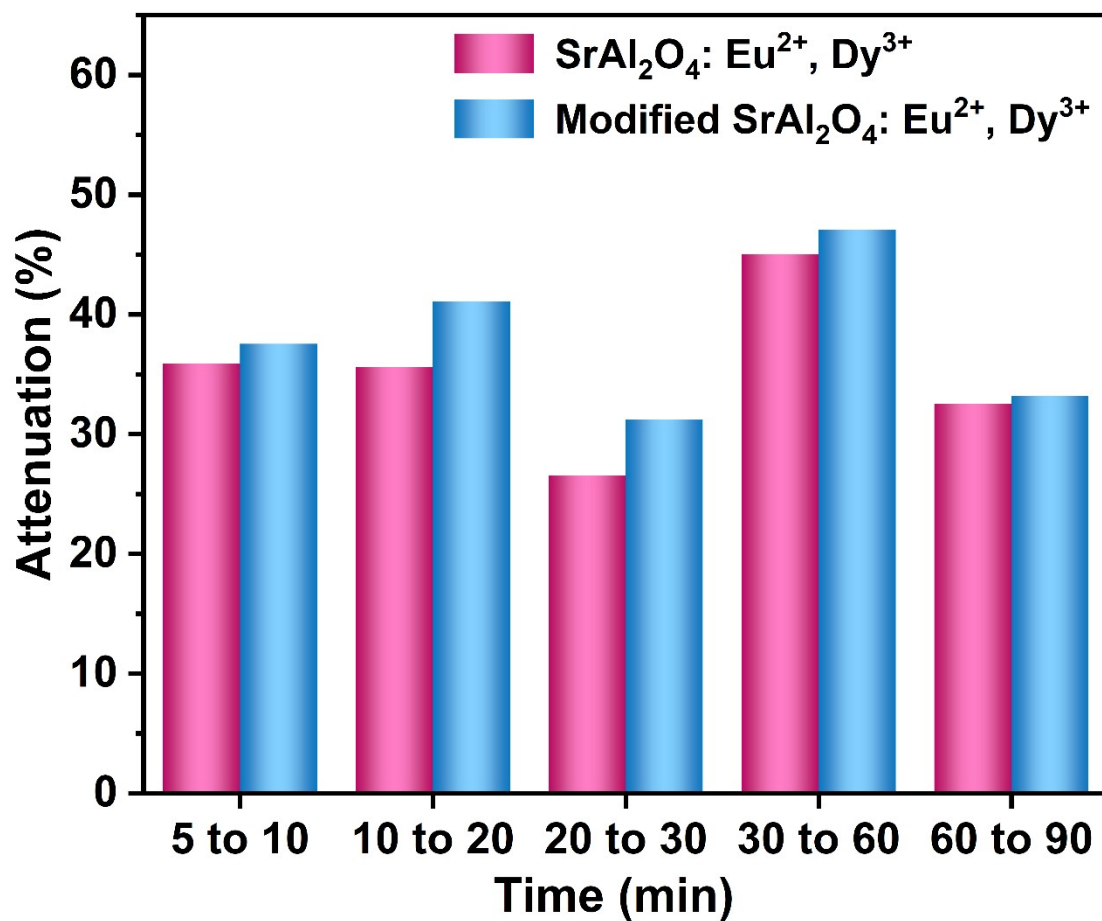

**Figure S3.** Comparison of PL intensity decay rate before and after powder modification.

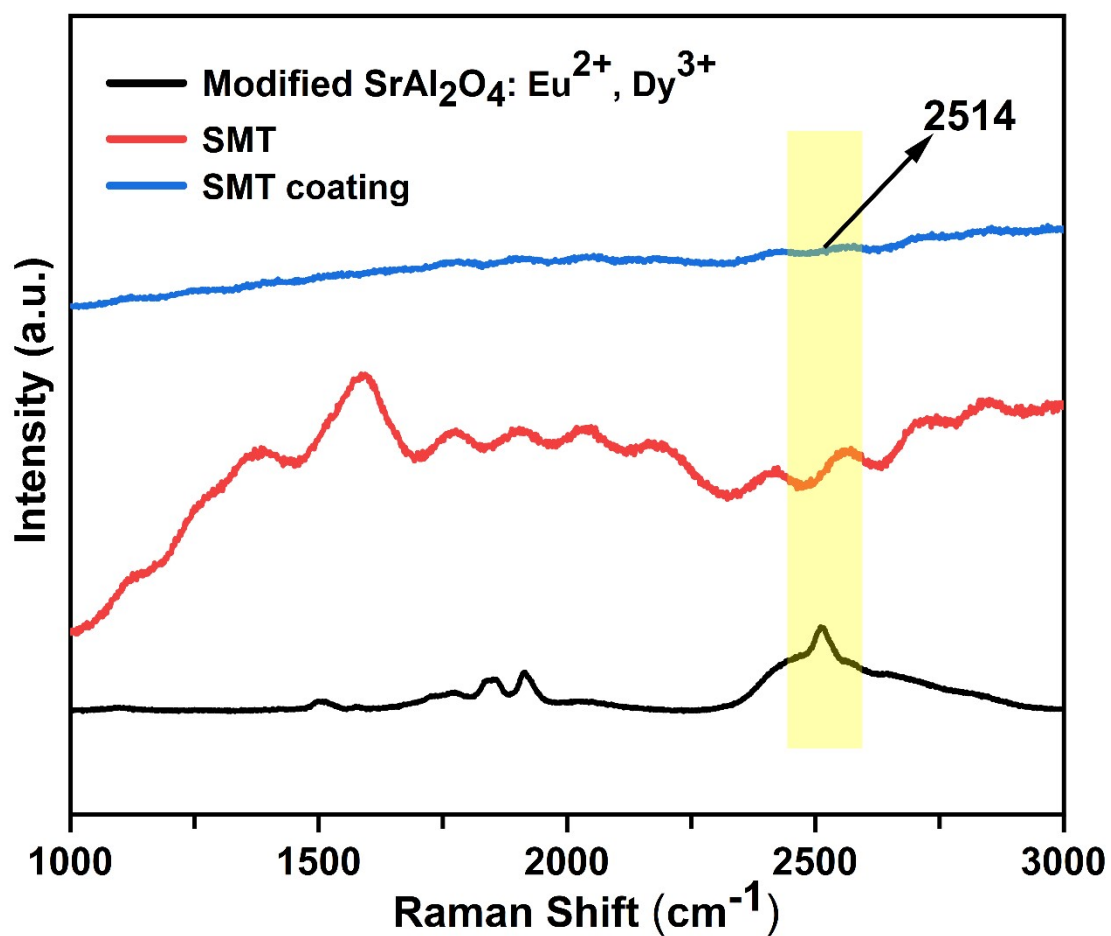

**Figure S4.** Raman spectra of SMT coatings. The yellow shaded area belongs to the characteristic area of modified SrAl<sub>2</sub>O<sub>4</sub>: Eu<sup>2+</sup>, Dy<sup>3+</sup> powder in SMT coatings.

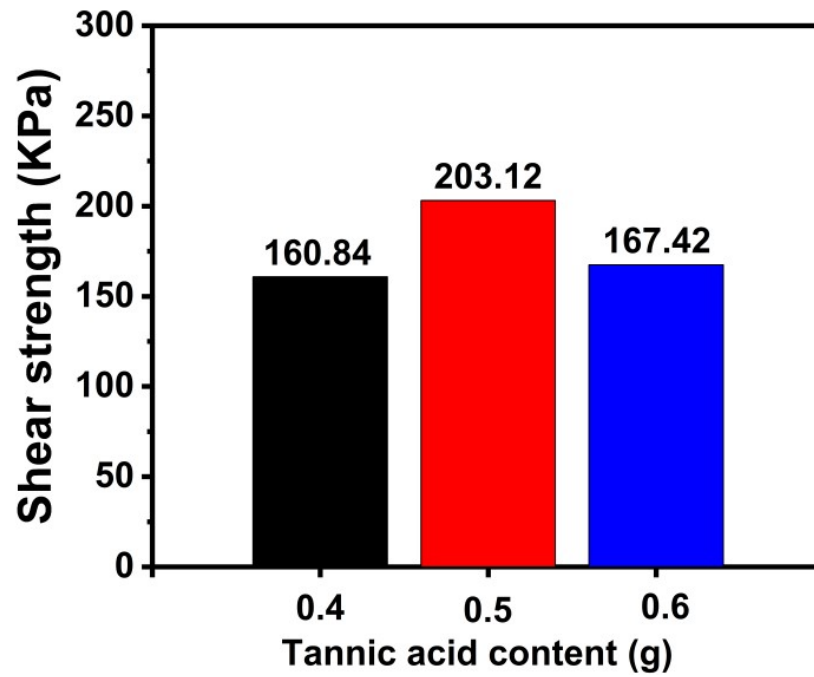

**Figure S5.** Keeping the content of epoxidized soybean oil and malic acid constant, shear strength of SMT coatings synthesized with different tannic acid (TA) contents at 200mm/min (TA=0.4, 0.5, 0.6g).

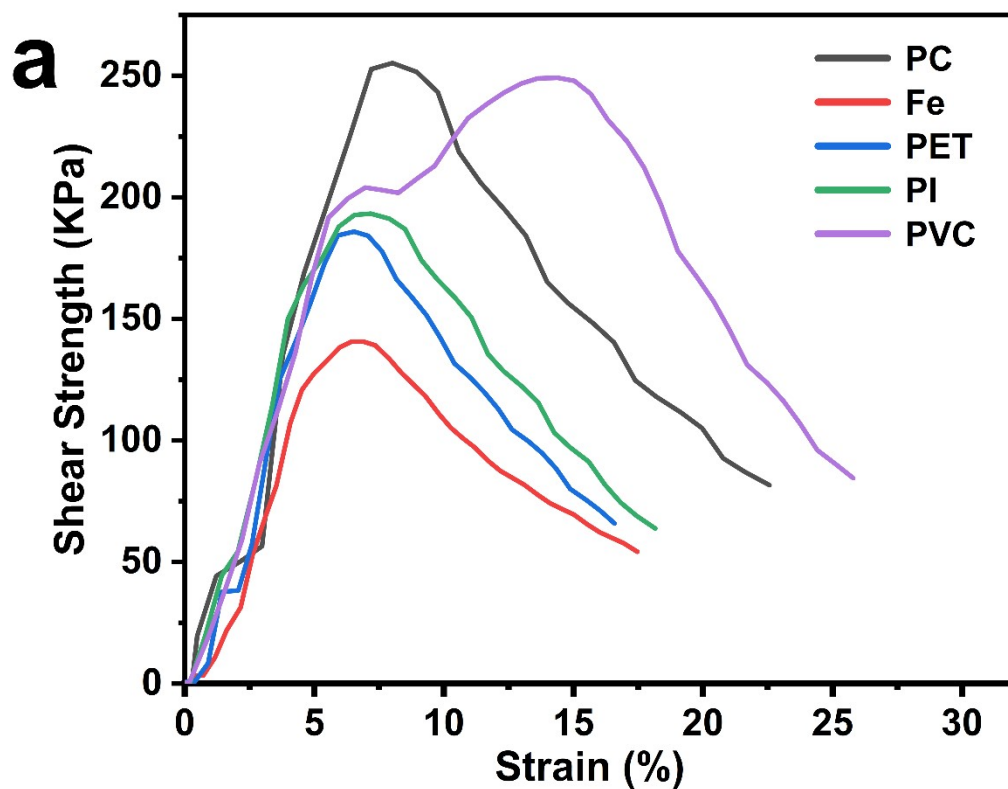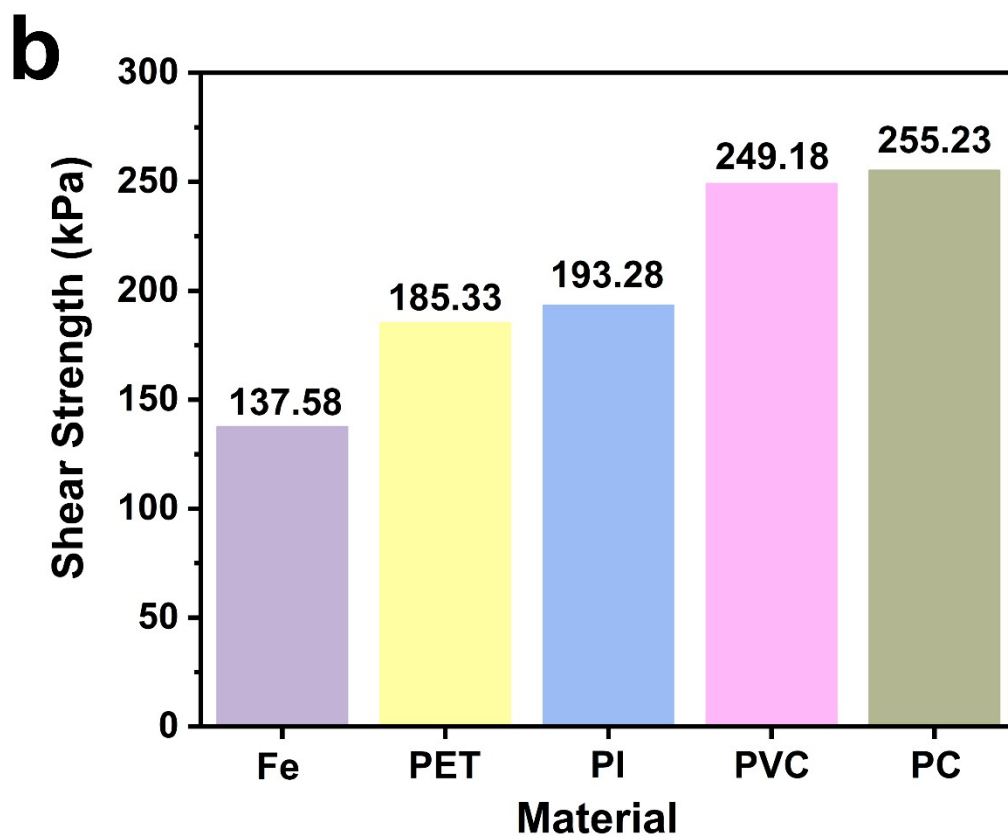

**Figure S6.** (a) The shear strength-strain curves of SMT coating after self-healing. (b) Shear strength of SMT coatings under different materials.

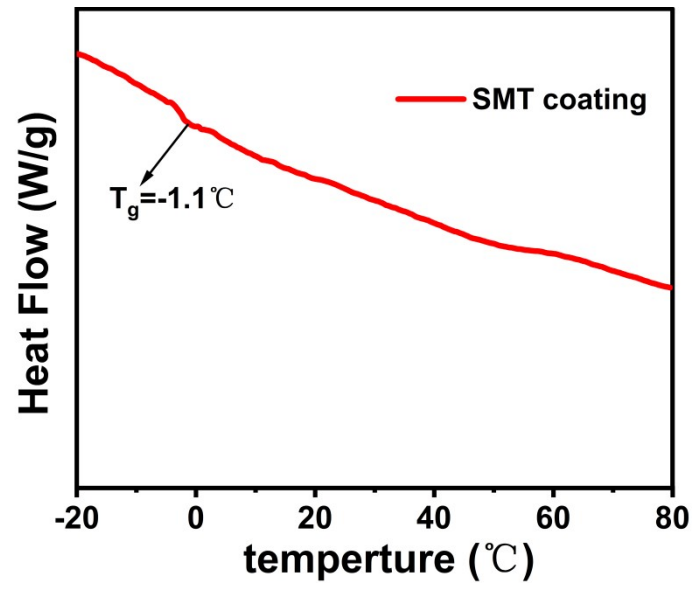

Figure S7. DSC thermograms for SMT coating.



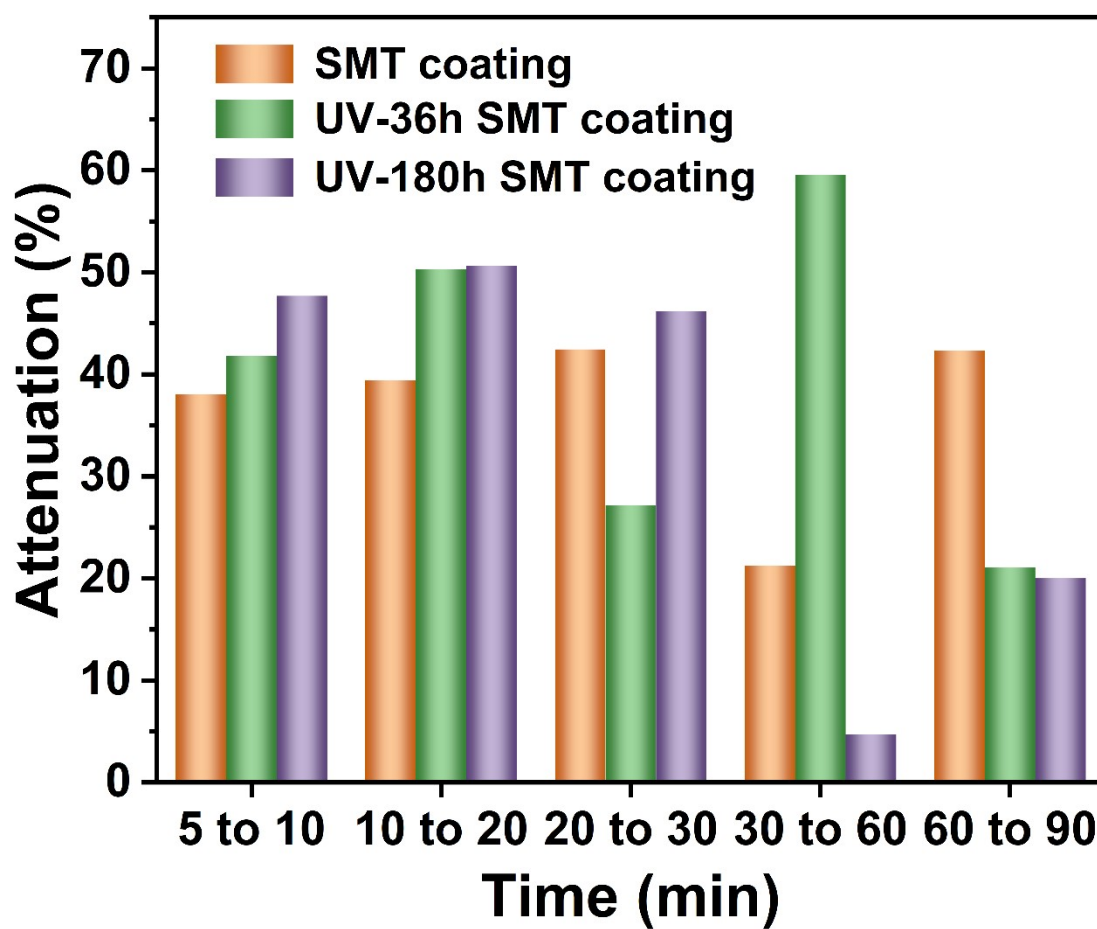

**Figure S8.** The PL intensity attenuation rates of SMT coating, UV-36 h SMT coating, and UV-108 h SMT coating were compared at different periods.

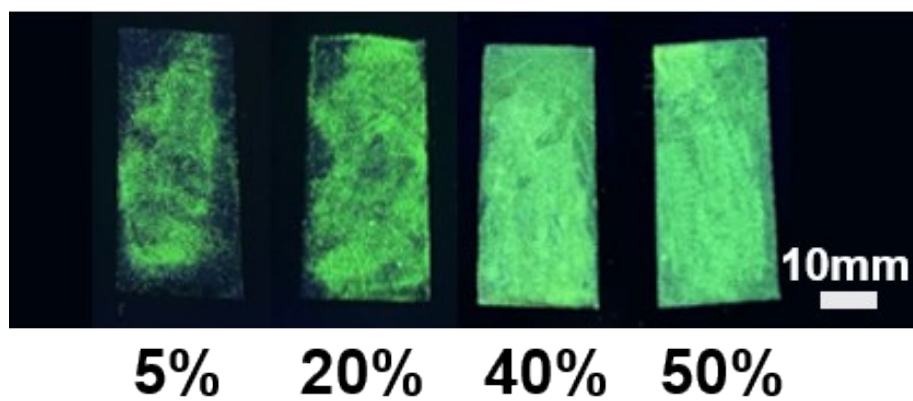

**Figure S9.** Images of different doping ratios of SrAl<sub>2</sub>O<sub>4</sub>: Eu<sup>2+</sup>, Dy<sup>3+</sup> powders mixed with SMT polymers under UV light.

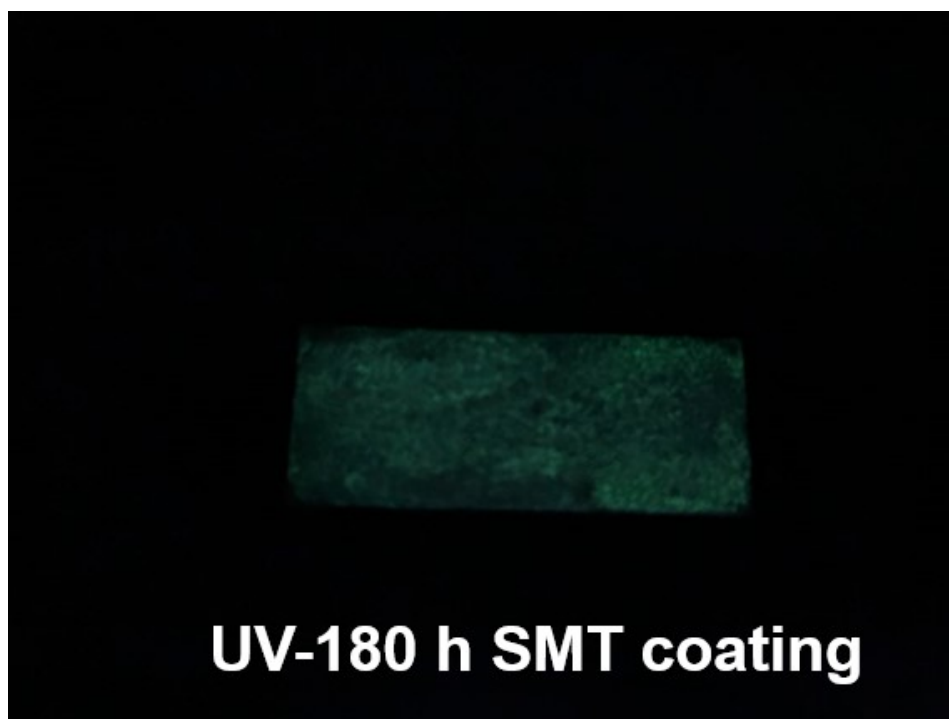

**Figure S10.** Image of UV-180 h SMT coating under dark conditions.

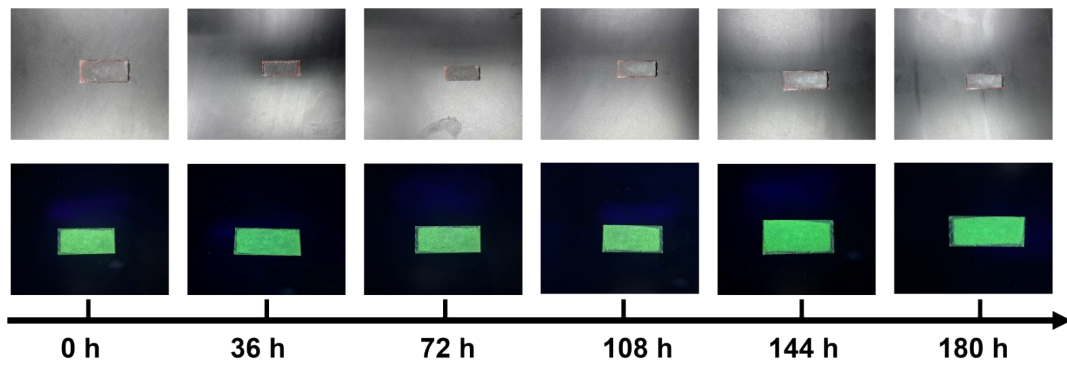

**Figure S11** After different cumulative exposure times with UV lamps, image of SMT coating placed in day and irradiated under 365nm UV.

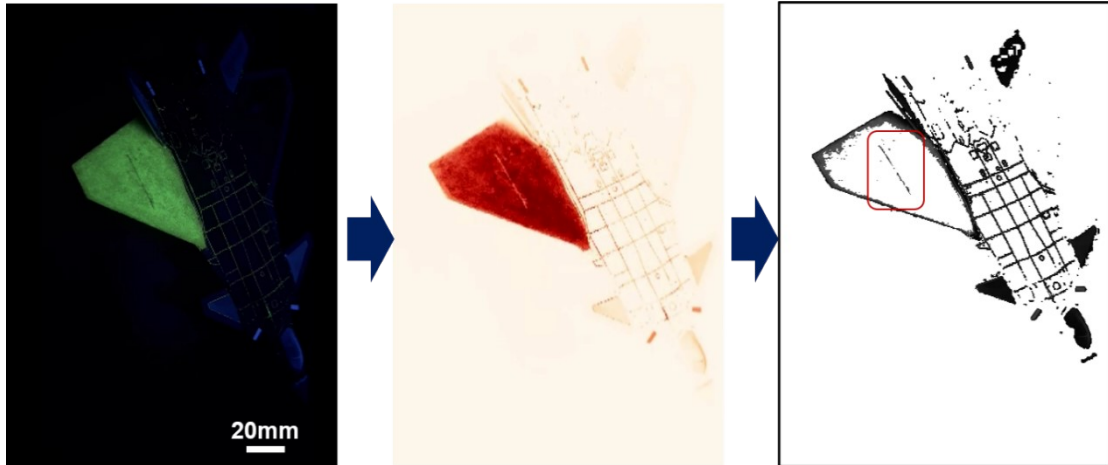

**Figure S12.** Original digital photo (left), heat map generated based on the green intensity (middle) and boundaries visualization (right) of the aircraft model.

To better analyze the cracks, the captured photos (720\*1280) was transformed into digital matrix pixel by pixel, every pixel was quantified as [R, G, B]. After extracting the intensity of green (G value) and generate a heat map, the distribution of green luminescence can be presented in real-time (Movie S2).

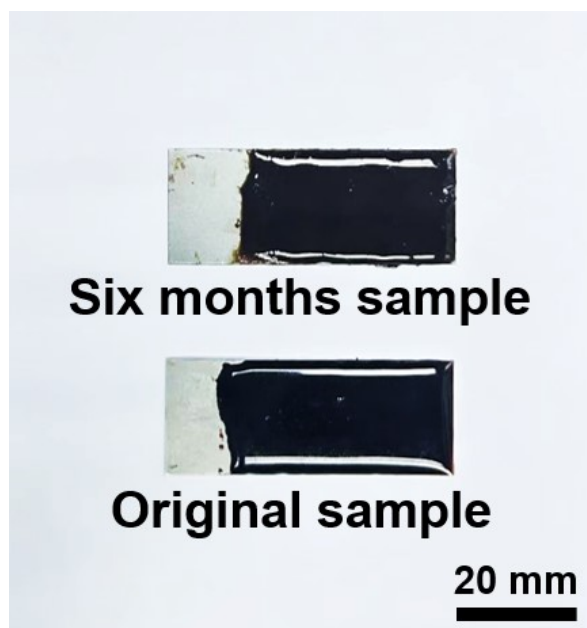

**Figure S13.** Images of SMT coating exposed to air for six months compared with the original coating.

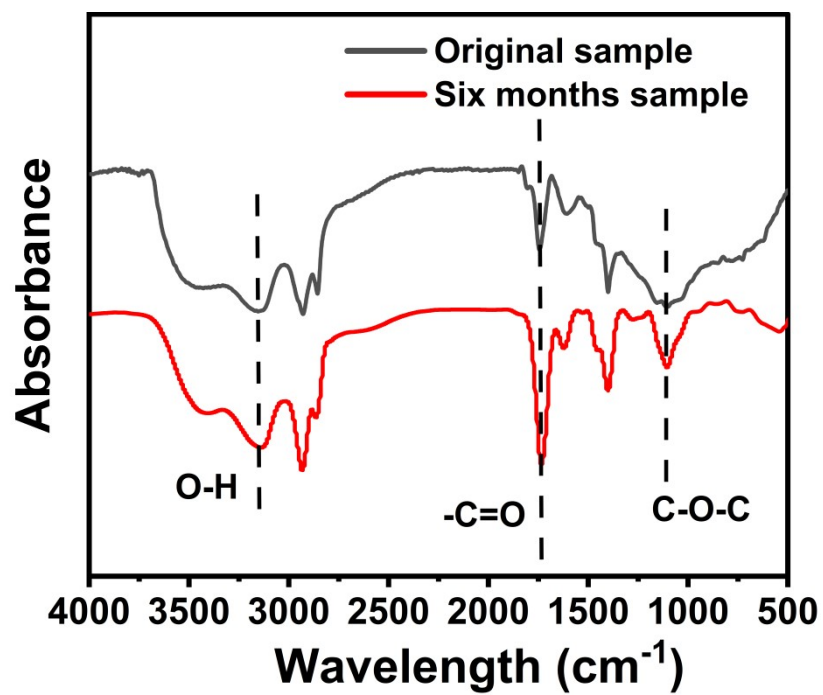

**Figure S14.** FTIR spectra of SMT coating exposed to air for six months compared with the original coating.

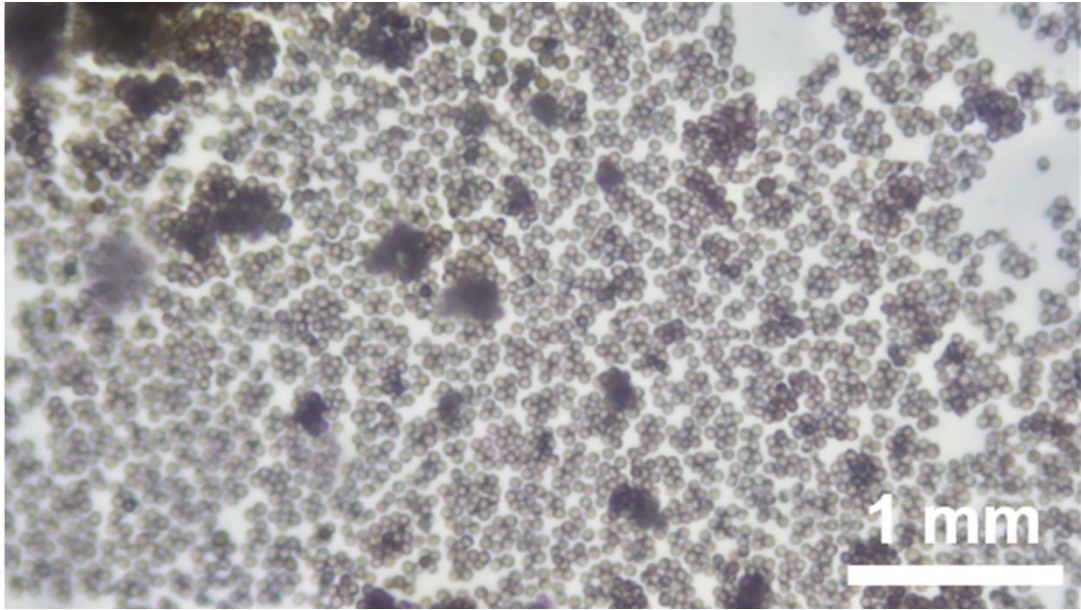

**Figure S15.** Electron microscope image of colonies during degradation.



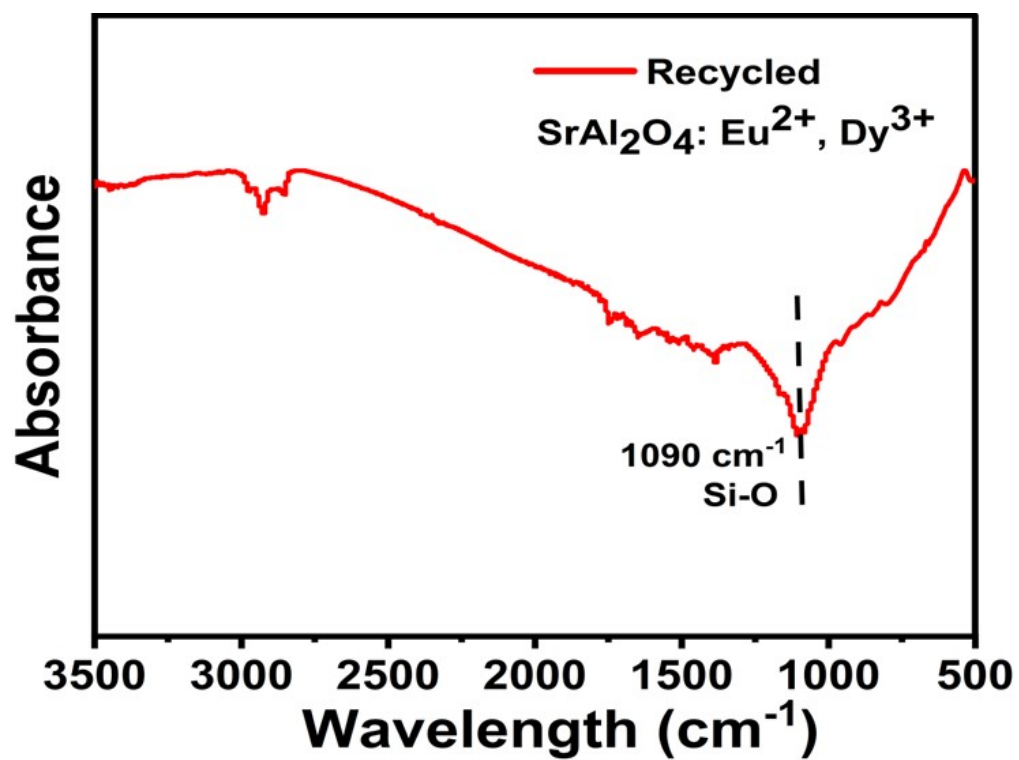

Figure S16. FTIR spectra of the recycled modified  $\text{SrAl}_2\text{O}_4: \text{Eu}^{2+}, \text{Dy}^{3+}$  powder.

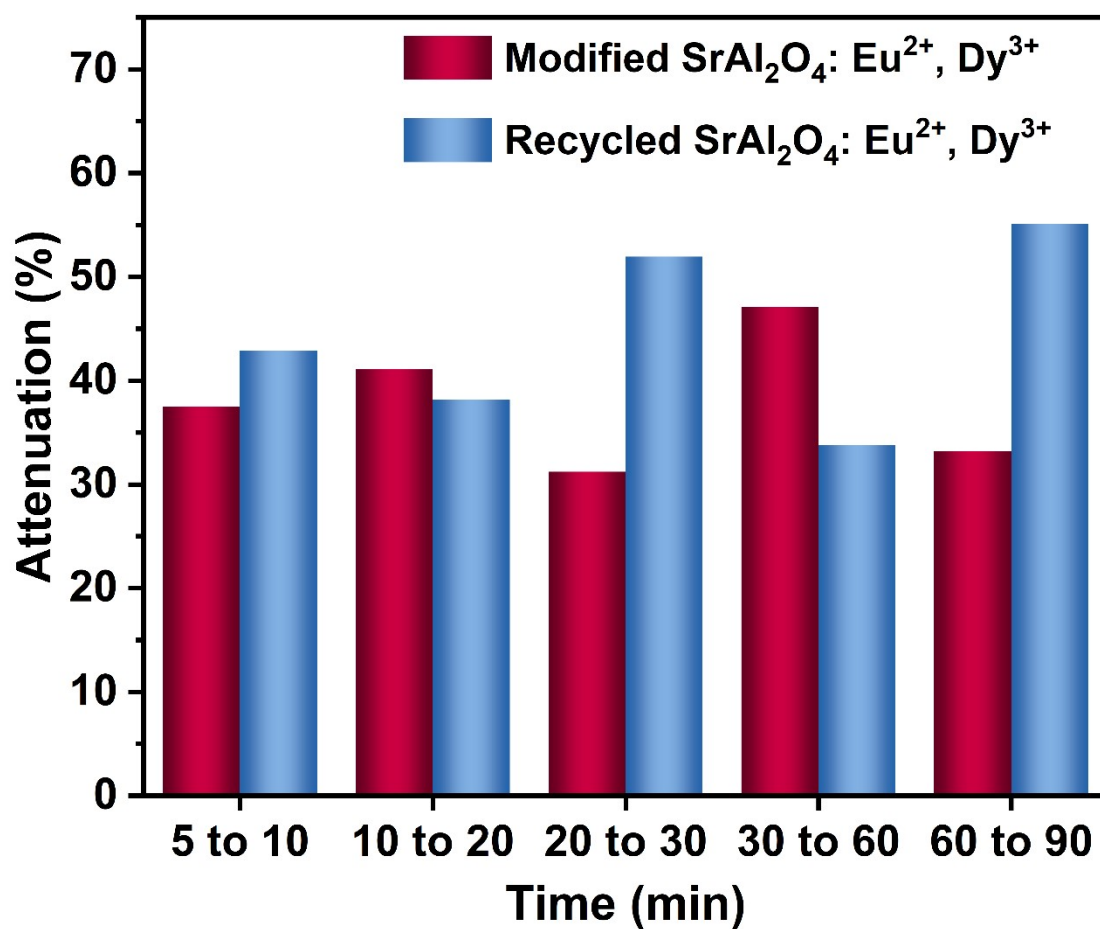

**Figure S17.** Comparison of PL intensity attenuation rate between recycled powder and modified powder.
